# Supplementary material for: Immune alterations in subacute sclerosing panencephalitis reflect an incompetent response to eliminate the measles virus
Source: PubMed Central journal article supplement (PMC7790413; doi:10.1371/journal.pone.0245077), 2021-01-07
Supplement: pone.0245077.s005.pdf [file pone.0245077.s005.pdf]

| SSPE<br>DNA # | SSPE<br>FENO<br>CD4+ | SSPE<br>FENO<br>CD8+ | SSPE<br>FENO<br>CD19+ | SSPE<br>FENO<br>CD3+ | SSPE<br>FENO<br>CD14+ | IKON<br>DNA # | IKON<br>FENO<br>CD4+ | IKON<br>FENO<br>CD8+ |
|---------------|----------------------|----------------------|-----------------------|----------------------|-----------------------|---------------|----------------------|----------------------|
| 2315          | 42,5                 | 25,5                 |                       | 70                   |                       | 3573          | 29,5                 | 24,4                 |
| 2325          |                      |                      |                       | 58                   | 72                    | 3574          | 28,2                 | 28,4                 |
| 2379          | 30,1                 | 39,5                 |                       | 68,5                 |                       | 3575          | 44,5                 | 33                   |
| 6707          | 41,9                 | 16,7                 |                       | 62                   | 63,6                  | 3576          | 53,7                 | 19,6                 |
| 6712          | 25,9                 | 26,3                 |                       | 51,5                 | 25,6                  | 3577          | 46,1                 | 28,1                 |
| 6719          | 35,1                 | 37,2                 |                       | 67                   | 32,4                  | 3578          | 47,7                 | 27,3                 |
| 6729          |                      | 15,9                 |                       | 41,8                 | 80,5                  | 3579          | 53,5                 | 32                   |
| 6734          | 32,2                 | 33,9                 |                       | 68,3                 | 74,8                  | 3580          | 33,9                 | 41,9                 |
| 6735          | 25,8                 | 24,4                 |                       | 56,6                 | 85,6                  | 3581          | 47,1                 | 25,2                 |
| 6750          | 30,5                 | 21,7                 |                       | 61,5                 | 29,2                  | 3582          | 32,4                 | 29,2                 |
| 6751          | 29,6                 | 23,6                 |                       | 59,2                 | 35,4                  | 3612          |                      |                      |
| 6752          | 30,5                 | 25                   |                       | 64,7                 | 62,7                  | 3613          |                      |                      |
| 6753          | 29,9                 | 25                   |                       | 66                   | 7,4                   | 3678          | 45,3                 | 26,3                 |
| 6754          | 11,6                 | 25,3                 |                       |                      | 74,2                  | 3679          | 33,5                 | 30,6                 |
| 6760          | 36,5                 | 32,9                 |                       |                      | 90,7                  | 3683          | 42,6                 | 27,3                 |
| 6762          | 16,2                 | 19,4                 |                       | 50,9                 | 74                    | 3684          | 33,9                 | 24,1                 |
| 6763          | 56                   | 44,6                 |                       | 72,3                 | 78,6                  | 3685          | 20,6                 | 31,2                 |
| 6764          | 27,4                 | 38,3                 |                       | 68,4                 | 60,3                  | 5831          | 35,3                 | 24,5                 |
| 6765          | 21                   | 23,9                 |                       | 50,1                 | 93,6                  | 5833          | 21,8                 | 27,5                 |
| 6766          | 42                   | 28                   |                       | 71,3                 | 67                    | 6714          | 40,5                 | 25                   |
| 6767          | 15,3                 | 45                   |                       | 65,5                 | 81,2                  | 6715          | 42                   | 30                   |
| 6768          | 31,9                 | 36,6                 |                       | 60,5                 | 59,6                  | 6717          | 30,5                 | 22,7                 |
| 6769          | 27,9                 | 21,7                 |                       | 52,5                 | 52,8                  | 6720          | 39,2                 | 44,5                 |
| 6776          | 34,4                 | 26,1                 |                       | 66,9                 | 88,2                  | 6723          | 18,7                 | 34,8                 |
| 6777          | 25,3                 | 20,4                 |                       | 47,9                 | 63,5                  | 6724          | 22                   | 20                   |
| 6786          | 18,1                 | 12,2                 |                       | 73,3                 | 85,2                  | 6725          | 36,5                 | 22,5                 |
| 6787          | 16,6                 | 18,7                 |                       | 50,7                 | 64,8                  | 6727          | 30,7                 | 27,6                 |
| 6788          | 27,5                 | 23                   |                       | 53,7                 | 74,3                  | 6731          |                      | 29,2                 |
| 6789          | 36,6                 | 23,4                 |                       | 64                   | 32,1                  | 6732          |                      | 24,1                 |
| 6792          | 21                   | 15                   |                       | 34,1                 | 25                    | 6736          | 34,1                 | 27,6                 |
| 6793          | 30                   | 26,4                 |                       | 60,5                 | 62,7                  | 6737          | 25,8                 | 36,5                 |
| 6794          | 39,8                 | 16,1                 |                       | 59,3                 | 59,8                  | 6738          | 28                   | 33,5                 |
| 6796          | 43,6                 | 22,8                 |                       | 67,2                 | 81,6                  | 6739          | 20,6                 | 7,9                  |
| 6797          |                      |                      |                       | 65                   | 92                    | 6740          | 36                   | 24,5                 |
| 6798          |                      |                      |                       | 42,4                 | 3,9                   | 6741          | 11,8                 | 18,2                 |
| 7801          |                      |                      |                       | 49,3                 | 5,2                   | 6742          | 37,7                 | 22                   |
| 7803          | 11,4                 | 29,7                 |                       | 33,5                 | 82,3                  | 6761          | 36,3                 | 15,8                 |
| 7805          | 24,3                 | 38,9                 |                       | 67,7                 | 89,3                  | 6770          | 16                   | 17,6                 |
| 7806          | 40,9                 | 32,3                 |                       | 74,4                 | 72,7                  | 6771          | 31                   | 25                   |
| 7809          | 62,8                 |                      |                       | 66,5                 | 95                    | 6772          | 13                   | 17,7                 |
| 7810          | 26,2                 | 40,6                 |                       | 76,4                 | 94,5                  | 6778          | 25                   | 34,3                 |
| 7813          | 34,5                 | 35                   |                       | 70,4                 | 93                    | 6783          | 31,7                 | 29,9                 |
| 7818          | 38,6                 | 41,8                 |                       | 79,2                 | 78,6                  | 6784          | 40,6                 | 16,2                 |
| 7822          | 41,3                 | 24,5                 |                       |                      |                       | 6790          | 23,2                 | 14,3                 |
| 7823          | 45,9                 | 9                    |                       |                      |                       | 6791          | 18,4                 | 11                   |
| 7826          | 43,3                 | 22,1                 |                       |                      |                       | 6800          |                      |                      |

|             |       |       |      |      |      |             |      |      |
|-------------|-------|-------|------|------|------|-------------|------|------|
| <b>7828</b> | 35,8  | 25,1  |      |      |      | <b>7802</b> |      |      |
| <b>7829</b> | 34,6  | 27,9  |      | 66,5 |      | <b>7804</b> |      |      |
| <b>7830</b> | 49,9  | 33,8  |      |      |      | <b>7819</b> | 49,8 | 33,7 |
| <b>7831</b> | 26,5  | 38,3  |      |      |      | <b>7842</b> | 37,6 | 20,3 |
| <b>7832</b> | 13,6  | 22,2  |      |      |      | <b>7848</b> | 42,8 | 25,3 |
| <b>7833</b> | 41,4  | 35,3  |      |      |      | <b>7852</b> | 42,6 | 21   |
| <b>7835</b> |       |       |      |      |      | <b>7855</b> | 34   | 16   |
| <b>7837</b> | 57,9  | 21,9  |      | 29,6 |      | <b>7857</b> | 41,4 | 47,9 |
| <b>7840</b> | 23,7  | 19,6  |      |      |      | <b>7860</b> | 46   | 31,5 |
| <b>7841</b> | 40    | 19,5  |      | 64,4 |      | <b>7862</b> | 26,7 | 13,8 |
| <b>7844</b> | 47,1  | 22,2  |      | 74   |      | <b>7865</b> | 34,5 | 26,4 |
| <b>7846</b> | 25    | 38,5  |      | 66,6 |      | <b>7867</b> | 41,2 | 24,2 |
| <b>7849</b> | 33,3  | 36,7  |      | 73,7 |      | <b>7871</b> | 23,8 | 24,9 |
| <b>7850</b> | 40,9  | 17    |      | 79,8 |      | <b>8215</b> | 49,5 | 22,2 |
| <b>7853</b> | 41,5  | 22    |      | 69,4 |      | <b>8216</b> | 26,8 | 47,2 |
| <b>7854</b> | 33,4  | 24,6  |      | 86   |      | <b>8224</b> | 37   | 20,2 |
| <b>7856</b> | 29,7  | 12,5  |      | 92,7 |      | <b>8225</b> | 30,1 | 34,2 |
| <b>7858</b> | 27,9  | 21,8  |      | 71,6 |      | <b>8227</b> | 43,4 | 23   |
| <b>7859</b> | 31,5  | 35,3  |      |      |      | <b>8228</b> | 47,6 | 28,4 |
| <b>7861</b> | 12,5  | 26,2  |      | 61,1 |      | <b>8234</b> | 46,3 | 23,3 |
| <b>7863</b> | 16,2  | 13,3  |      | 59,6 |      | <b>8238</b> | 49,5 | 28,5 |
| <b>7866</b> | 32,3  | 30,7  | 17,3 |      |      | <b>8280</b> | 30,7 | 20,1 |
| <b>7868</b> | 19,3  | 22,2  | 22,2 |      |      | <b>8281</b> | 28,3 | 33,4 |
| <b>7869</b> | 18,1  | 22,1  | 18,1 |      |      | <b>8282</b> | 21,3 | 36,6 |
| <b>7872</b> | 34,9  | 26,9  | 12,9 |      |      | <b>8283</b> | 39,2 | 23,1 |
| <b>7873</b> | 32,2  | 35,1  | 10,2 |      |      |             |      |      |
| <b>7874</b> | 24,8  | 22,5  | 6,8  |      |      |             |      |      |
| <b>7876</b> | 29,1  | 29,2  | 14,1 |      |      |             |      |      |
| <b>7879</b> | 29,8  | 39,7  | 2,4  |      |      |             |      |      |
| <b>7880</b> | 35    | 23,5  | 3,1  |      |      |             |      |      |
| <b>7883</b> | 33    | 24,8  | 11,2 |      |      |             |      |      |
| <b>7884</b> | 28,6  | 41,2  | 11,6 |      |      |             |      |      |
| <b>7886</b> | 24,1  |       |      |      |      |             |      |      |
| <b>7888</b> | 23,4  | 18,8  | 25,7 |      |      |             |      |      |
| <b>7889</b> | 27,4  | 37,1  | 6,9  |      |      |             |      |      |
| <b>7891</b> | 44,7  | 29,9  | 12,2 |      |      |             |      |      |
| <b>7892</b> | 41,3  | 29,4  | 5,9  |      |      |             |      |      |
| <b>7893</b> | 34,3  | 35,4  |      |      |      |             |      |      |
| <b>7899</b> | 32,4  | 30,4  | 12,5 |      |      |             |      |      |
| <b>8042</b> | 35    | 34,7  | 9    | 67,4 | 88,5 |             |      |      |
| <b>8054</b> | 48,1  | 33,9  | 2    |      | 97,4 |             |      |      |
| <b>8056</b> | 54,3  | 21,8  | 18   |      |      |             |      |      |
| <b>8057</b> | 51,5  | 29,1  | 13   |      |      |             |      |      |
| <b>8061</b> | 48,9  | 32,2  | 12   | 82,7 | 99,1 |             |      |      |
| <b>8065</b> | 44,6  | 28,4  | 9    | 79,4 | 91,3 |             |      |      |
| <b>8066</b> | 36,8  | 37,9  | 7    | 71,4 | 92,5 |             |      |      |
| <b>8067</b> | 46,3  | 27,4  | 14   | 70,6 | 91,4 |             |      |      |
| <b>8068</b> | 27,1  | 30,6  | 19   | 63,8 | 88   |             |      |      |
| <b>8069</b> | 21,9  | 7,5   | 3    | 44,6 |      |             |      |      |
| <b>8069</b> | 50,84 | 12,77 | 5,15 | 76,1 | 2,42 |             |      |      |

|             |       |       |      |       |      |
|-------------|-------|-------|------|-------|------|
| <b>8070</b> | 6,6   | 4,2   | 1    | 12,7  | 8,3  |
| <b>8070</b> | 41,82 | 25,79 | 5,68 | 15,49 | 7,91 |

| <b>IKON<br/>FENO<br/>CD19+</b> | <b>IKON<br/>FENO<br/>CD3+</b> | <b>IKON<br/>FENO<br/>CD14+</b> | <b>NIKON<br/>DNA #</b> | <b>NIKON<br/>FENO<br/>CD4+</b> | <b>NIKON<br/>FENO<br/>CD8+</b> | <b>NIKON<br/>FENO<br/>CD19+</b> | <b>NIKON<br/>FENO<br/>CD3+</b> | <b>NIKON<br/>FENO<br/>CD14+</b> |
|--------------------------------|-------------------------------|--------------------------------|------------------------|--------------------------------|--------------------------------|---------------------------------|--------------------------------|---------------------------------|
| 13,9                           | 64,1                          |                                | <b>3559</b>            | 28,8                           | 45                             | 4,1                             | 67,7                           | 65,39                           |
| 12,5                           | 0,4                           | 95,1                           | <b>3560</b>            | 27,8                           | 49,5                           | 10,5                            | 64                             | 95,4                            |
| 13,2                           | 71,7                          | 52,9                           | <b>3565</b>            |                                |                                |                                 |                                |                                 |
| 6,1                            | 75,29                         | 93,84                          | <b>3614</b>            |                                |                                |                                 |                                |                                 |
| 6,3                            | 77,17                         | 85,48                          | <b>4344</b>            | 49,1                           | 23,4                           |                                 | 76,5                           | 77                              |
|                                | 76,6                          | 96,9                           | <b>4379</b>            | 37,8                           | 49                             |                                 | 78,6                           | 70,5                            |
| 2,6                            | 82,5                          | 94,4                           | <b>4382</b>            |                                |                                |                                 |                                |                                 |
| 6,5                            | 77,8                          | 98,8                           | <b>5832</b>            | 35,5                           | 33,2                           | 6,4                             |                                |                                 |
| 12,2                           | 67,2                          | 78,9                           | <b>5834</b>            | 29,5                           | 43,6                           | 7                               |                                |                                 |
| 10,2                           | 66,5                          | 90,6                           | <b>6716</b>            | 41,9                           | 31,8                           |                                 | 76,5                           | 91                              |
|                                |                               |                                | <b>6721</b>            | 41,6                           | 30                             |                                 |                                | 73,4                            |
|                                |                               |                                | <b>6722</b>            | 35,1                           | 34,3                           |                                 | 68,9                           | 67,3                            |
| 11,5                           | 71                            | 70,6                           | <b>6726</b>            | 48,9                           | 24,1                           |                                 | 79,6                           | 70                              |
| 17,5                           | 61,7                          | 94,7                           | <b>6728</b>            | 18                             | 27                             |                                 | 51,4                           | 73                              |
| 6,4                            | 69                            | 90                             | <b>6730</b>            |                                | 18,9                           |                                 | 65,1                           | 84,9                            |
| 7,3                            | 56,8                          | 95,2                           | <b>6733</b>            |                                | 18                             |                                 | 64,2                           | 85                              |
| 6,1                            | 65                            | 84,5                           | <b>6743</b>            | 12,5                           | 29,5                           |                                 | 77,7                           |                                 |
| 13,6                           |                               |                                | <b>6744</b>            |                                | 17,9                           |                                 |                                | 96                              |
| 8,7                            |                               |                                | <b>6759</b>            | 45,6                           | 26,8                           |                                 | 74,5                           | 48,6                            |
|                                | 66,2                          | 87,2                           | <b>6779</b>            | 36,4                           | 25,8                           |                                 | 62                             | 88,2                            |
|                                | 70                            | 93,9                           | <b>6780</b>            | 38,8                           | 29,3                           |                                 | 72,9                           | 79                              |
|                                | 61,5                          | 84,2                           | <b>6781</b>            | 26,6                           | 24                             |                                 | 49,8                           | 75,8                            |
|                                | 81,8                          | 73                             | <b>6782</b>            | 17,5                           | 23,7                           |                                 | 80,5                           | 76,8                            |
|                                | 61,2                          | 76,5                           | <b>6785</b>            | 32                             | 17                             |                                 | 77,6                           | 69                              |
|                                | 46,1                          | 72,5                           | <b>6799</b>            |                                |                                |                                 | 76,1                           | 12,1                            |
|                                | 68,8                          | 61,7                           | <b>7807</b>            | 59,2                           |                                |                                 | 46                             | 57,5                            |
|                                | 66,7                          | 50,5                           | <b>7811</b>            |                                |                                |                                 |                                |                                 |
|                                | 71,3                          | 72                             | <b>7812</b>            | 32,9                           | 21,5                           |                                 | 68                             | 60,4                            |
|                                | 67,2                          | 76                             | <b>7814</b>            |                                |                                |                                 |                                |                                 |
|                                | 59,2                          | 85                             | <b>7815</b>            |                                |                                |                                 |                                |                                 |
|                                | 54                            | 87                             | <b>7820</b>            | 33,8                           | 52,8                           |                                 | 77,8                           | 66,4                            |
|                                | 64                            | 79,8                           | <b>7824</b>            | 44,9                           | 22,5                           |                                 |                                |                                 |
|                                | 58                            | 90,2                           | <b>7825</b>            | 23,7                           | 31,4                           |                                 |                                |                                 |
|                                | 49,4                          | 89                             | <b>7827</b>            | 38,2                           | 22                             |                                 |                                |                                 |
|                                | 80                            |                                | <b>7834</b>            | 34,1                           | 32                             |                                 |                                |                                 |
|                                | 71                            | 91,6                           | <b>7845</b>            |                                | 36,6                           |                                 |                                | 67,6                            |
|                                | 60,6                          | 72,9                           | <b>7847</b>            | 47,9                           | 21,7                           |                                 |                                | 48,9                            |
|                                | 43,5                          | 29,5                           | <b>7851</b>            | 35,5                           | 27,1                           |                                 |                                | 48,4                            |
|                                | 76,4                          | 65,4                           | <b>7864</b>            | 38,3                           | 28,3                           |                                 |                                |                                 |
|                                | 16                            | 75                             | <b>7870</b>            | 36,3                           | 15,7                           | 13                              |                                |                                 |
|                                | 47,7                          | 82,7                           | <b>7885</b>            | 27,5                           | 38,1                           | 10,4                            |                                |                                 |
|                                | 63,7                          | 76,9                           | <b>7896</b>            | 57,9                           | 28                             | 3,8                             |                                |                                 |
|                                | 77                            | 66                             | <b>8060</b>            | 51,9                           | 19,4                           | 16                              | 75,2                           | 95,9                            |
|                                | 40,9                          | 46                             | <b>8071</b>            | 45,47                          | 24,72                          | 5,04                            | 29,21                          | 5,46                            |
|                                | 46,6                          | 41,3                           |                        |                                |                                |                                 |                                |                                 |

75,7      79,1

80,3      62,9  
81,4  
73  
41,9  
67,2  
77,4  
52,2  
68,8

11,2  
12,3

37,3  
49,9  
26,8  
42,4  
32,5  
13,1

10,1  
8,2  
12,8  
10,1

| DONÖR | SSPE SI (-)<br>IgG1<br>SPON | SSPE SI<br>CD3+CD2<br>8 | SSPE (-)<br>IgG1<br>SPON-IL-<br>2 | SSPE<br>CD3/CD2<br>8-IL-2 | SSPE (-)<br>IgG1<br>SPON-IL-<br>10 | SSPE<br>CD3/CD2<br>8-IL-10 | SSPE (-)<br>IgG1<br>SPON-IL-<br>12p40 | SSPE<br>CD3/CD2<br>8-IL-<br>12p40 |
|-------|-----------------------------|-------------------------|-----------------------------------|---------------------------|------------------------------------|----------------------------|---------------------------------------|-----------------------------------|
| 2325  |                             |                         | 32,02                             | 11,86                     |                                    |                            |                                       |                                   |
| 2385  |                             |                         | 0                                 | 0                         | 8,7                                | 5,2                        | 574,3                                 | 291,7                             |
| 2389  | 2004,8                      | 5,7                     | 0                                 | 0                         | 2                                  | 2,2                        | 12,5                                  | 31,5                              |
| 2390  | 1686                        | 0,7                     | 0                                 | 0                         | 3,8                                | 3,2                        | 56,9                                  | 44,5                              |
| 2391  | 252                         | 3,8                     | 0                                 | 0                         | 4,6                                | 8,3                        | 40,6                                  | 30,8                              |
| 2392  |                             |                         | 0                                 | 0                         | 0,7                                | 2,5                        | 7,4                                   | 12,2                              |
| 2394  | 209,5                       | 2,4                     | 0                                 | 38,5                      | 1,7                                | 0,3                        | 7,7                                   | 6,1                               |
| 2396  | 1499,5                      | 14,3                    | 0                                 | 0                         | 1,5                                | 6,3                        | 254,3                                 | 646,5                             |
| 2397  |                             |                         | 0                                 | 0                         | 2,8                                | 1,4                        | 23,1                                  | 31,3                              |
| 2398  | 909,7                       | 40,3                    | 0                                 | 108,9                     | 45,7                               | 212,1                      | 851                                   | 720,3                             |
| 2399  | 419,8                       | 23,7                    | 3,6                               | 103,7                     | 14,3                               | 16,9                       | 392,7                                 | 446,4                             |
| 2400  | 539,8                       | 5,9                     | 1,3                               | 111                       | 4,3                                | 8,3                        | 165,2                                 | 310,1                             |
| 6701  | 478,3                       | 0,9                     | 12                                | 72,8                      | 0,8                                | 1                          | 304,5                                 | 237,8                             |
| 6702  | 411,7                       | 1,1                     | 83,8                              | 72,8                      | 0,8                                | 1,6                        | 330,9                                 | 225,2                             |
| 6703  | 311,5                       | 16,9                    | 1035                              | 244,3                     | 0,5                                | 1,1                        | 233,8                                 | 196,3                             |
| 6704  | 269                         | 18,9                    | 287,5                             | 83,8                      | 2,8                                | 5,5                        | 445,1                                 | 285,9                             |
| 6712  | 393,5                       | 36,7                    | 428                               | 183                       | 0,3                                | 1,8                        | 225,2                                 | 208,5                             |
| 6729  | 756,3                       | 3,2                     | 273,8                             | 130,1                     | 12,1                               | 4,5                        | 285,9                                 | 218,4                             |
| 6750  | 344,3                       | 62,5                    | 9,8                               | 6,7                       | 2,7                                | 16,5                       | 332,6                                 | 551,7                             |
| 6751  | 472                         | 2                       | 8                                 | 7,1                       | 3                                  | 3,1                        | 196,8                                 | 89,1                              |
| 6752  | 339,3                       | 3,7                     | 10,7                              | 8                         | 0,2                                | 0,3                        | 222,5                                 | 79,6                              |
| 6797  |                             |                         |                                   |                           |                                    |                            |                                       |                                   |
| 6798  |                             |                         | 10                                | 28,1                      | 12,6                               | 11,3                       | 385,8                                 | 153,4                             |
| 7803  |                             |                         | 5                                 | 18,7                      | 30                                 | 141,3                      | 1657,5                                | 1687,7                            |
| 7805  |                             |                         | 23,9                              | 39,4                      | 220,9                              | 108,4                      | 545,6                                 | 1459,1                            |
| 7806  |                             |                         | 8,7                               | 31,2                      | 6,7                                | 9                          | 60,1                                  | 62,8                              |
| 7809  |                             |                         | 33,3                              | 13,1                      | 706,5                              | 246                        | 888,7                                 | 446,4                             |
| 7810  |                             |                         | 15                                | 16,6                      | 22,8                               | 26,1                       | 202,2                                 | 265,1                             |
| 7813  |                             |                         | 8,1                               | 40,7                      | 44,1                               | 127,8                      | 1912,5                                | 1900,2                            |
| 7818  |                             |                         | 4,4                               | 10,6                      | 15,3                               | 3,3                        | 90,8                                  | 33,7                              |

| SSPE (-)<br>IgG1<br>SPON-IL-<br>12p70 | SSPE<br>CD3/CD2<br>8-IL-<br>12p70 | SSPE (-)<br>IgG1<br>SPON-<br>IFNg | SSPE<br>CD3/CD2<br>8-IFNg | DONÖR       | IKON SI (-<br>) IgG1<br>SPON | IKON SI<br>CD3+CD2<br>8 | IKON (-)<br>IgG1<br>SPON-IL-2 | IKON<br>CD3/CD2<br>8-IL-2 |
|---------------------------------------|-----------------------------------|-----------------------------------|---------------------------|-------------|------------------------------|-------------------------|-------------------------------|---------------------------|
|                                       |                                   | 1,6                               | 235,3                     | <b>6723</b> | 341,5                        | 67,9                    | 0                             | 0                         |
| 30,7                                  | 28,7                              |                                   |                           | <b>6724</b> | 658,7                        | 0,7                     | 0                             | 0                         |
| 6,9                                   | 9,1                               | 0                                 | 0                         | <b>6727</b> | 359,8                        | 45,1                    | 0                             | 2,6                       |
| 6                                     | 6,9                               | 0,4                               | 0                         | <b>6725</b> |                              |                         | 7,6                           | 9,4                       |
| 6,6                                   | 7,5                               | 0,1                               | 0                         | <b>6742</b> | 764,5                        | 48,6                    | 11,6                          | 0,9                       |
| 6,4                                   | 7,8                               | 0                                 | 0,4                       | <b>6748</b> | 721                          | 27,6                    | 7,1                           | 9,8                       |
| 8,3                                   | 14,2                              | 0                                 | 0                         | <b>2386</b> |                              |                         | 0                             | 13,1                      |
| 6                                     | 26,1                              | 0                                 | 142,4                     | <b>2395</b> |                              |                         | 10                            | 8,7                       |
| 7,7                                   | 8,8                               | 0                                 | 0,1                       | <b>7802</b> |                              |                         |                               | 39                        |
| 9,8                                   | 10,7                              | 17,3                              | 2069,4                    | <b>7804</b> |                              |                         | 8,7                           | 6,9                       |
| 7,3                                   | 8,2                               | 2,6                               | 8,9                       | <b>7808</b> |                              |                         | 8,7                           | 14,4                      |
| 6,2                                   | 9,2                               | 1,3                               | 16,4                      | <b>7816</b> |                              |                         | 31,2                          | 14,4                      |
| 8,1                                   | 7,1                               | 0,4                               | 0,5                       | <b>7819</b> |                              |                         | 61,7                          | 8,7                       |
| 5,7                                   | 7,3                               | 0,4                               | 1                         |             |                              |                         |                               |                           |
| 7                                     | 7,4                               | 0,9                               | 4,2                       |             |                              |                         |                               |                           |
| 9,4                                   | 5,4                               | 0,9                               | 32                        |             |                              |                         |                               |                           |
| 15,4                                  | 14,8                              | 1,1                               | 3,4                       |             |                              |                         |                               |                           |
| 6                                     | 13,2                              | 0,6                               | 0,6                       |             |                              |                         |                               |                           |
| 14                                    | 14,3                              | 0,3                               | 2,9                       |             |                              |                         |                               |                           |
| 13,9                                  | 12,9                              | 0,2                               | 1,3                       |             |                              |                         |                               |                           |
| 13,6                                  | 13,7                              | 0,4                               | 3,2                       |             |                              |                         |                               |                           |
|                                       |                                   | 4,3                               | 9,4                       |             |                              |                         |                               |                           |
| 20,8                                  | 19,9                              |                                   |                           |             |                              |                         |                               |                           |
| 45,3                                  | 61,8                              | 12,5                              | 1777,8                    |             |                              |                         |                               |                           |
| 0,4                                   | 22,9                              | 2,2                               | 901                       |             |                              |                         |                               |                           |
| 0,7                                   | 1,8                               | 2,3                               | 14,5                      |             |                              |                         |                               |                           |
| 2,2                                   | 2,7                               | 2,6                               | 2355,9                    |             |                              |                         |                               |                           |
| 0                                     | 1,6                               | 19,9                              | 1496,5                    |             |                              |                         |                               |                           |
| 96,5                                  | 232,9                             | 779,5                             | 1352,4                    |             |                              |                         |                               |                           |
| 0                                     | 0                                 | 1,6                               | 1,6                       |             |                              |                         |                               |                           |





| NIKON SI (-<br>) IgG1<br>SPON | NIKON SI<br>CD3+CD2<br>8 | NIKON (-)<br>IgG1<br>SPON-IL-2 | NIKON<br>CD3/CD28-<br>IL-2 | NIKON (-)<br>IgG1<br>SPON-IL-<br>10 | NIKON<br>CD3/CD28-<br>IL-10 | NIKON (-)<br>IgG1<br>SPON-IL-<br>12p40 | NIKON<br>CD3/CD28-<br>IL-12p40 | NIKON (-)<br>IgG1<br>SPON-IL-<br>12p70 |
|-------------------------------|--------------------------|--------------------------------|----------------------------|-------------------------------------|-----------------------------|----------------------------------------|--------------------------------|----------------------------------------|
|                               |                          | 0                              | 0                          | 87,3                                | 42,1                        | 249,6                                  | 124,4                          | 4,1                                    |
| 420                           | 1                        | 0                              | 0                          | 40,9                                | 22                          | 465,6                                  | 150,7                          | 6                                      |
| 1491,8                        | 24,1                     | 0                              | 0                          | 38,3                                | 29,7                        | 296                                    | 187,8                          | 4,2                                    |
| 636                           | 55,2                     | 0                              | 0                          | 17,9                                | 54,2                        | 193,5                                  | 289                            | 10,8                                   |
| 403,8                         | 60,6                     | 0                              | 0                          | 8,7                                 | 18,4                        | 311,2                                  | 313,5                          | 14,3                                   |
|                               |                          | 0                              | 0                          | 4,4                                 | 3,2                         | 717,8                                  | 453,7                          | 15,2                                   |
| 361                           | 20                       | 5,8                            | 9,4                        | 48                                  | 55,9                        | 283,3                                  | 168,8                          | 10,7                                   |
| 268,8                         | 104                      | 4,9                            | 0                          | 4,8                                 | 32,2                        | 370,2                                  | 227,9                          | 12,2                                   |
| 226,7                         | 1                        | 0                              | 0                          | 1,2                                 | 0,3                         | 13,6                                   | 3,7                            | 8,5                                    |
| 353                           | 2,8                      | 0                              | 0                          | 5,1                                 | 2,1                         | 277,2                                  | 127,3                          | 6                                      |
|                               |                          | 6,9                            | 5,6                        | 588,6                               | 159,2                       | 1545,4                                 | 1093,2                         | 7,5                                    |
|                               |                          | 11,2                           | 33,7                       | 130,6                               | 73,8                        | 197,7                                  | 150,7                          | 0,5                                    |
|                               |                          | 13,7                           | 15                         | 94,1                                | 183,4                       | 1011,9                                 | 1119,7                         | 4,4                                    |
|                               |                          | 13,1                           | 7,5                        | 71,8                                | 36,9                        | 442,9                                  | 390,6                          | 6,9                                    |
|                               |                          | 32,4                           | 44,8                       | 109,7                               | 273                         | 2200                                   | 2200                           | 95,2                                   |
|                               |                          | 47,3                           | 6,9                        | 60,4                                | 105,6                       | 433                                    | 1154,2                         | 0                                      |

| <b>NIKON<br/>CD3/CD28-<br/>IL-12p70</b> | <b>NIKON (-)<br/>IgG1<br/>SPON-<br/>IFNg</b> | <b>NIKON<br/>CD3/CD28-<br/>IFNg</b> |
|-----------------------------------------|----------------------------------------------|-------------------------------------|
| 5                                       | 0                                            | 0,2                                 |
| 6,3                                     | 1,5                                          | 0                                   |
| 11,1                                    | 0                                            | 0                                   |
| 14                                      | 0                                            | 1185,8                              |
| 14,6                                    | 0                                            | 178,7                               |
| 13                                      | 0                                            | 0                                   |
| 14,8                                    | 1,2                                          | 17,5                                |
| 12,4                                    | 1,5                                          | 751,7                               |
| 8,3                                     | 0,4                                          | 0,1                                 |
| 11,8                                    | 0,3                                          | 0,6                                 |
| 3,8                                     | 18,1                                         | 2574,7                              |
| 1,4                                     | 1,9                                          | 572,9                               |
| 9,1                                     | 40                                           | 2184                                |
| 5,7                                     | 12,7                                         | 23,3                                |
| 53,5                                    | 242,4                                        | 574,7                               |
| 4,9                                     | 15,7                                         | 240,1                               |

| DNA # SSPE | (-) IL12P70<br>SSPE | SAC<br>IL12P70<br>SSPE | (-) IFNG<br>SSPE | SAC IFNG<br>SSPE | (-) IL10<br>SSPE | SAC IL10<br>SSPE | (-) IL23<br>SSPE | SAC IL23<br>SSPE |
|------------|---------------------|------------------------|------------------|------------------|------------------|------------------|------------------|------------------|
| 2397       | 7,8                 | 5                      | 0,9              | 0                |                  |                  | 27,5             | 32,8             |
| 6752       | 18,5                | 17,5                   | 0                | 0                | 16,2             | 17,5             | 22,6             | 23,3             |
| 2382       | 5,2                 | 5,3                    | 3,6              | 7,3              | 1,2              | 125,4            |                  |                  |
| 6704       | 6,6                 | 5,3                    | 0                | 1,7              | 0                | 8,6              | 28,2             | 28,6             |
| 2381       | 5,9                 | 0,6                    | 0                | 0                | 5,4              | 11,6             | 44,4             | 28,6             |
| 2379       | 4,1                 | 3,5                    | 0                | 0                | 20,2             | 0                |                  |                  |
| 2380       | 11,1                | 5,1                    | 0                | 0                | 0                | 8,6              | 25,8             | 31,9             |
| 6750       | 15,6                | 14,7                   | 0                | 0                | 24,7             | 37,6             | 19,6             | 22,3             |
| 2399       | 18,2                | 16,2                   | 0,6              | 13,3             | 3,8              | 58,7             | 22,9             | 34,7             |
| 2376       | 2,7                 | 2,2                    |                  |                  |                  |                  |                  |                  |
| 2372       | 3,8                 | 2,9                    | 0,1              | 0,2              | 14,5             | 13,1             |                  |                  |
| 2375       | 3,8                 | 5,1                    | 0                | 1,8              | 15,3             | 43,2             | 31,1             | 27,8             |
| 2394       | 5,2                 | 5,2                    | 0                | 0                | 0                | 23,8             | 25,1             | 27,4             |
| 6702       | 19,3                | 16,7                   | 0                | 12               | 0                | 0                | 44,4             | 139,8            |
| 6701       | 16,7                | 5,7                    | 0                | 0                | 18,8             | 15,3             | 45,4             | 49,2             |
| 6754       | 17,8                | 17,1                   | 0                | 0                | 4,6              | 29,9             | 46,3             | 39,4             |
| 2391       | 6,9                 | 1,6                    | 0                | 0                |                  |                  |                  |                  |
| 2374       | 2,4                 | 2,2                    | 0                | 0                | 0                | 1,2              |                  |                  |
| 6703       | 3,5                 | 3,7                    | 0                | 0,2              | 16,2             | 32,7             | 24,7             | 26,6             |
| 2392       | 3,9                 | 11,8                   | 0                | 0                |                  |                  |                  |                  |
| 2396       |                     |                        | 0                | 59,4             | 25,6             | 27               | 31,1             | 33,6             |
| 2304       | 3,7                 | 1,6                    |                  |                  |                  |                  | 26,6             | 24,3             |
| 6712       | 8,4                 | 7,4                    | 0                | 0,2              | 23,8             | 55,9             | 17,7             | 24,3             |
| 2400       | 13,1                | 10,2                   | 0                | 0                | 1,2              | 0                | 22,9             | 22,6             |
| 2398       | 4,9                 | 3,6                    |                  |                  | 22,9             | 39,6             | 27,4             | 33,2             |
| 6729       | 5,9                 | 7,8                    | 7,3              | 72,3             | 17,5             | 28,9             | 37,6             | 27,8             |
| 2303       | 7                   | 6,5                    |                  |                  |                  |                  |                  |                  |

| (-)<br>IL12P40<br>SSPE | SAC<br>IL12P40<br>SSPE | DNA #<br>ICON | (-)<br>IL12P70<br>ICON | SAC<br>IL12P70<br>ICON | (-) IFNG<br>ICON | SAC IFNG<br>ICON | (-) IL10<br>ICON | SAC IL10<br>ICON |
|------------------------|------------------------|---------------|------------------------|------------------------|------------------|------------------|------------------|------------------|
| 19,3                   | 13,2                   | <b>6748</b>   | 17,6                   | 17                     | 0                | 0,5              | 16,2             | 20,6             |
| 69,7                   | 209,6                  | <b>6724</b>   | 6,8                    | 10,9                   | 0                | 0                | 0                | 28,8             |
| 372,3                  | 610,4                  | <b>6723</b>   | 10                     | 10,1                   | 0                | 0                | 11,6             | 25,3             |
| 180,2                  | 176,7                  | <b>6742</b>   | 16                     | 12,5                   | 0,1              | 0,9              | 0                | 10,8             |
| 99,4                   | 105,1                  | <b>6727</b>   | 6,9                    | 8,8                    | 0                | 0                | 35               | 262,8            |
| 48,6                   | 21,1                   | <b>6725</b>   | 9,2                    | 7,3                    | 0                | 0                | 15,3             | 31,6             |
| 1,9                    | 7,7                    |               |                        |                        |                  |                  |                  |                  |
| 145,3                  | 466,7                  |               |                        |                        |                  |                  |                  |                  |
| 221                    | 703,2                  |               |                        |                        |                  |                  |                  |                  |
| 9,3                    | 47,3                   |               |                        |                        |                  |                  |                  |                  |
| 472,9                  | 400,9                  |               |                        |                        |                  |                  |                  |                  |
| 76                     | 111,4                  |               |                        |                        |                  |                  |                  |                  |
| 0                      | 0                      |               |                        |                        |                  |                  |                  |                  |
| 32,9                   | 163,3                  |               |                        |                        |                  |                  |                  |                  |
| 25,2                   | 30,3                   |               |                        |                        |                  |                  |                  |                  |
| 79,1                   | 277,6                  |               |                        |                        |                  |                  |                  |                  |
| 48,5                   | 48,2                   |               |                        |                        |                  |                  |                  |                  |
| 32,6                   | 41,2                   |               |                        |                        |                  |                  |                  |                  |
| 6,1                    | 18,3                   |               |                        |                        |                  |                  |                  |                  |
| 0                      | 0                      |               |                        |                        |                  |                  |                  |                  |
| 110,4                  | 228,2                  |               |                        |                        |                  |                  |                  |                  |
| 13,4                   | 195,7                  |               |                        |                        |                  |                  |                  |                  |
| 283,8                  | 103,5                  |               |                        |                        |                  |                  |                  |                  |
| 387,7                  | 619,3                  |               |                        |                        |                  |                  |                  |                  |

| <b>(-) IL23<br/>ICON</b> | <b>SAC IL23<br/>ICON</b> | <b>(-)<br/>IL12P40<br/>ICON</b> | <b>SAC<br/>IL12P40<br/>ICON</b> | <b>DNA #<br/>NICON1</b> | <b>(-)<br/>IL12P70<br/>NICON1</b> | <b>SAC<br/>IL12P70<br/>NICON1</b> | <b>(-) IFNG<br/>NICON1</b> | <b>SAC IFNG<br/>NICON1</b> |
|--------------------------|--------------------------|---------------------------------|---------------------------------|-------------------------|-----------------------------------|-----------------------------------|----------------------------|----------------------------|
| 20,3                     | 27,5                     | 211,6                           | 344,2                           | <b>6747</b>             | 16,3                              | 15,8                              | 0                          | 0                          |
| 23,3                     | 24,7                     | 331,3                           | 370                             | <b>6746</b>             | 18,4                              | 16,9                              | 0                          | 0                          |
| 33,9                     | 29,7                     | 414                             | 328,7                           | <b>6744</b>             | 16,6                              | 16,4                              | 0                          | 6,5                        |
| 36,3                     | 24                       | 181,1                           | 238                             | <b>6755</b>             |                                   |                                   | 0                          | 0,2                        |
| 27,5                     | 26,4                     | 57,3                            | 208,4                           | <b>6757</b>             |                                   |                                   | 0                          | 0,6                        |
| 22,6                     | 24                       | 148,5                           | 165,8                           | <b>6726</b>             | 5,9                               | 9,7                               | 0                          | 1,4                        |
|                          |                          |                                 |                                 | <b>6756</b>             |                                   |                                   | 0                          | 0                          |
|                          |                          |                                 |                                 | <b>6718</b>             | 11,8                              | 7,1                               | 0,1                        | 14,3                       |
|                          |                          |                                 |                                 | <b>6728</b>             | 7                                 | 7,1                               | 0                          | 0                          |
|                          |                          |                                 |                                 | <b>6745</b>             | 16                                | 16,4                              | 0                          | 0                          |
|                          |                          |                                 |                                 | <b>6743</b>             | 7,8                               | 4,3                               | 0                          | 0,5                        |
|                          |                          |                                 |                                 | <b>6716</b>             | 12,2                              | 9,8                               | 0                          | 0,6                        |
|                          |                          |                                 |                                 | <b>6758</b>             |                                   |                                   |                            |                            |
|                          |                          |                                 |                                 | <b>6722</b>             | 11,3                              | 9,4                               | 0                          | 0,7                        |
|                          |                          |                                 |                                 | <b>4382</b>             | 5,3                               | 5,5                               | 0                          | 0                          |
|                          |                          |                                 |                                 | <b>4377</b>             | 12,6                              | 10,3                              | 0                          | 1,1                        |
|                          |                          |                                 |                                 | <b>4381</b>             | 5,2                               | 5,6                               | 0                          | 0                          |
|                          |                          |                                 |                                 | <b>4385</b>             | 2,5                               | 12,4                              | 1,5                        | 15,7                       |
|                          |                          |                                 |                                 | <b>4359</b>             | 17,9                              | 16,5                              | 0                          | 0                          |
|                          |                          |                                 |                                 | <b>4383</b>             | 4,8                               | 5,5                               | 0                          | 0                          |
|                          |                          |                                 |                                 | <b>4379</b>             | 16,9                              | 11,9                              |                            |                            |
|                          |                          |                                 |                                 | <b>4387</b>             | 14,1                              | 12,8                              | 0                          | 3,1                        |
|                          |                          |                                 |                                 | <b>4393</b>             | 5,2                               | 4,7                               | 0,6                        | 0                          |
|                          |                          |                                 |                                 | <b>4392</b>             | 5,5                               | 6,5                               | 0                          | 0                          |
|                          |                          |                                 |                                 | <b>4396</b>             | 5,4                               | 5,9                               | 0                          | 0                          |
|                          |                          |                                 |                                 | <b>4404</b>             | 5,3                               | 6,9                               | 0                          | 0                          |
|                          |                          |                                 |                                 | <b>4378</b>             | 15,3                              | 15,2                              | 0                          | 0                          |

| <b>(-) IL10<br/>NICON1</b> | <b>SAC IL10<br/>NICON1</b> | <b>(-) IL23<br/>NICON1</b> | <b>SAC IL23<br/>NICON1</b> | <b>(-)<br/>IL12P40<br/>NICON1</b> | <b>SAC<br/>IL12P40<br/>NICON1</b> |
|----------------------------|----------------------------|----------------------------|----------------------------|-----------------------------------|-----------------------------------|
| 18,4                       | 40,6                       | 26,8                       | 22,9                       | 904,3                             | 4002,6                            |
| 17,5                       | 17,5                       | 24                         | 23,3                       | 309,6                             | 174,7                             |
| 0                          | 19,6                       | 27,5                       | 29,7                       | 221,6                             | 319,2                             |
| 18,4                       | 19,7                       | 29,9                       | 32,4                       | 56,7                              | 58,5                              |
| 17,1                       | 18,8                       | 22,9                       | 29,3                       | 91,4                              | 93,4                              |
| 3                          | 38,4                       | 32,8                       | 34,3                       | 123,7                             | 219,7                             |
| 45,1                       | 29,9                       | 20,9                       | 22,9                       | 83,5                              | 85,9                              |
| 6,2                        | 67,3                       | 36,7                       | 32,4                       | 360,4                             | 621,6                             |
| 27,4                       | 93,1                       | 30,1                       | 27,2                       | 116,5                             | 157                               |
| 20,6                       | 15,3                       | 24,7                       | 23,6                       | 17,4                              | 23,4                              |
| 0                          | 0                          | 21,6                       | 24                         | 74                                | 67,5                              |
| 17,5                       | 98,4                       | 36,7                       | 34,1                       | 200,6                             | 273,6                             |
| 7                          | 11,6                       | 23,1                       | 23,5                       |                                   |                                   |
| 1,2                        | 14,5                       | 32,4                       | 30,7                       | 87,2                              | 136,9                             |
|                            |                            | 31,5                       | 48,7                       | 46,6                              | 101,4                             |
| 25,6                       | 30,8                       | 22,3                       | 26,1                       | 14,9                              | 24,3                              |
| 24,7                       | 25,6                       | 20,6                       | 24,3                       | 45,1                              | 64                                |
| 18,4                       | 114,5                      | 48,2                       | 32,8                       | 164,1                             | 198,9                             |
| 19,7                       | 18,8                       | 21,9                       | 24,3                       | 7,4                               | 3,4                               |
| 20,2                       | 21,1                       | 19,6                       | 23,3                       | 61,4                              | 91                                |
| 14,9                       | 89,7                       | 38,9                       | 29                         | 59,3                              | 139,8                             |
| 17,1                       | 27,5                       | 29,7                       | 24,7                       | 47,8                              | 29,9                              |
|                            |                            |                            |                            | 0                                 | 0                                 |
| 14,1                       | 40,6                       | 22,9                       | 28,6                       | 115,7                             | 236,4                             |
| 14,1                       | 38,1                       | 36,2                       | 29                         | 0                                 | 8                                 |
| 15,8                       | 24,7                       | 25                         | 27,9                       | 54,9                              | 107,4                             |

| DNA<br>SSPE | CD4+DE<br>CD4+<br>SLAM+<br>SSPE | CD8+DE<br>CD8+<br>SLAM+<br>SSPE | CD8+ DE<br>PD1+<br>SSPE | CD19+ DA<br>SLAM+<br>SSPE | CD14+<br>CD46+<br>SSPE | DNA<br>İKON | CD4+DE<br>CD4+<br>SLAM+<br>İKON | CD8+DE<br>CD8+<br>SLAM+<br>İKON |
|-------------|---------------------------------|---------------------------------|-------------------------|---------------------------|------------------------|-------------|---------------------------------|---------------------------------|
| 7856        | 1,95                            | 1,61                            |                         |                           |                        | 3678        | 39,9                            | 45,98                           |
| 7888        | 0,58                            | 0,28                            | 0,08                    | 0,07                      |                        | 3679        | 30,6                            | 13,2                            |
| 7886        |                                 |                                 |                         |                           |                        | 3684        | 24,95                           | 6,17                            |
| 2315        |                                 |                                 |                         |                           |                        | 3685        | 15,17                           | 10,89                           |
| 2325        |                                 |                                 |                         |                           | 24,3                   | 8228        | 2,2                             | 0,4                             |
| 2379        |                                 |                                 |                         |                           |                        | 8238        | 3,3                             |                                 |
| 6707        |                                 |                                 |                         |                           | 63,6                   | 3683        | 17,46                           | 8,14                            |
| 6712        |                                 |                                 |                         |                           | 25,55                  | 6761        |                                 |                                 |
| 6719        |                                 |                                 |                         |                           | 32,4                   | 6771        |                                 |                                 |
| 6729        |                                 |                                 |                         |                           | 80,3                   | 6772        |                                 |                                 |
| 6734        |                                 |                                 |                         |                           | 22,3                   | 7857        |                                 |                                 |
| 6735        |                                 |                                 |                         |                           | 69,12                  | 7865        | 1,3                             | 14,32                           |
| 6750        |                                 |                                 |                         |                           | 3,13                   | 7871        | 3,2                             | 0,03                            |
| 6751        |                                 |                                 |                         |                           | 7,32                   | 6790        |                                 |                                 |
| 6752        |                                 |                                 |                         |                           | 62,2                   | 6791        |                                 |                                 |
| 6753        |                                 |                                 |                         |                           | 7,26                   | 7804        |                                 |                                 |
| 6754        |                                 |                                 |                         |                           | 75,6                   | 7848        | 0,62                            | 0                               |
| 6760        |                                 |                                 |                         |                           | 90,7                   | 6714        |                                 |                                 |
| 6762        |                                 |                                 |                         |                           | 70,9                   | 6717        |                                 |                                 |
| 6763        |                                 |                                 |                         |                           | 78,6                   | 6723        |                                 |                                 |
| 6764        |                                 |                                 |                         |                           | 59,3                   | 6731        |                                 |                                 |
| 6765        |                                 |                                 |                         |                           | 91,01                  | 6732        |                                 |                                 |
| 6766        |                                 |                                 |                         |                           | 66,9                   | 6736        |                                 |                                 |
| 6767        |                                 |                                 |                         |                           | 71,8                   | 6738        |                                 |                                 |
| 6768        |                                 |                                 |                         |                           | 59,23                  | 6739        |                                 |                                 |
| 6769        |                                 |                                 |                         |                           | 52,6                   | 6740        |                                 |                                 |
| 6776        |                                 |                                 |                         |                           | 88,08                  | 6742        |                                 |                                 |
| 6777        |                                 |                                 |                         |                           | 62,28                  | 6783        |                                 |                                 |
| 6786        |                                 |                                 |                         |                           | 84,6                   | 8215        |                                 | 0                               |
| 6787        |                                 |                                 |                         |                           | 64,2                   | 8216        | 41                              | 0                               |
| 6788        |                                 |                                 |                         |                           | 73,2                   | 8224        | 5,7                             | 0                               |
| 6789        |                                 |                                 |                         |                           | 32,05                  | 8227        | 2,4                             | 0                               |
| 6792        |                                 |                                 |                         |                           | 24,4                   | 8280        |                                 |                                 |
| 6793        |                                 |                                 |                         |                           | 62,3                   | 8281        | 47,35                           | 28,29                           |
| 6794        |                                 |                                 |                         |                           | 58,6                   | 8282        | 13,81                           | 7,45                            |
| 6796        |                                 |                                 |                         |                           | 81,6                   | 6725        |                                 |                                 |
| 6797        |                                 |                                 |                         |                           | 81                     | 6724        |                                 |                                 |
| 6798        |                                 |                                 |                         |                           | 3,9                    | 6800        |                                 |                                 |
| 7801        |                                 |                                 |                         |                           | 5,1                    | 6770        |                                 |                                 |
| 7803        |                                 |                                 |                         |                           | 37,26                  | 7852        | 2,25                            | 0,33                            |
| 7805        |                                 |                                 |                         |                           | 87,7                   | 7842        | 28,79                           | 0,53                            |
| 7806        |                                 |                                 |                         |                           |                        | 3613        |                                 |                                 |
| 7809        |                                 |                                 |                         |                           |                        | 7802        |                                 |                                 |
| 7810        |                                 |                                 |                         |                           |                        | 7819        |                                 |                                 |
| 7813        |                                 |                                 |                         |                           |                        | 6741        |                                 |                                 |
| 7818        |                                 |                                 |                         |                           | 75,7                   | 6778        |                                 |                                 |

|             |       |       |       |       |       |             |       |       |
|-------------|-------|-------|-------|-------|-------|-------------|-------|-------|
| <b>7822</b> |       |       |       |       |       | <b>6799</b> |       |       |
| <b>7826</b> |       |       |       |       |       | <b>6784</b> |       |       |
| <b>7828</b> |       |       |       |       |       | <b>7855</b> | 4,7   | 1,86  |
| <b>7829</b> |       |       |       |       |       | <b>7860</b> | 9,24  | 0     |
| <b>7831</b> | 94,2  | 3,12  |       |       |       | <b>7862</b> | 7,8   | 0,08  |
| <b>7832</b> |       |       |       |       |       | <b>7867</b> | 17,6  |       |
| <b>7833</b> |       |       |       |       |       | <b>6727</b> |       |       |
| <b>7835</b> |       |       |       |       |       | <b>6737</b> |       |       |
| <b>7837</b> | 1,84  | 0,04  |       |       |       | <b>6720</b> |       |       |
| <b>7844</b> | 1,27  | 0     |       |       |       | <b>3573</b> | 21,23 | 21,41 |
| <b>7846</b> | 2     | 0,2   |       |       |       | <b>3574</b> | 20,2  | 12,67 |
| <b>7849</b> | 5,45  | 0,1   |       |       |       | <b>3575</b> | 12,85 | 3,86  |
| <b>7854</b> | 25,59 | 20,65 |       |       |       | <b>3576</b> | 2,4   | 7,78  |
| <b>7858</b> | 6,45  | 1,5   |       |       |       | <b>3577</b> | 3,05  | 19,6  |
| <b>7859</b> | 16    | 0,32  |       |       |       | <b>3578</b> |       |       |
| <b>7863</b> | 19,1  | 0,14  |       |       |       | <b>3579</b> | 23,21 | 7,24  |
| <b>7866</b> | 8,4   | 0,1   |       | 0,1   |       | <b>3580</b> | 18,68 | 7,92  |
| <b>7868</b> | 4,1   |       |       |       |       | <b>3581</b> | 11,33 | 7,86  |
| <b>7869</b> | 3,1   | 0,2   | 0,22  | 2,44  |       | <b>3582</b> | 21,08 | 10,93 |
| <b>7872</b> | 16,43 | 8     | 0,72  | 17,31 |       | <b>3612</b> |       |       |
| <b>7873</b> | 4,69  | 1,03  | 0,22  | 21,76 |       | <b>5831</b> | 0,48  | 0,32  |
| <b>7874</b> | 12    | 6,28  | 0,16  | 11,86 |       | <b>5833</b> | 0,33  | 1,19  |
| <b>7876</b> | 37,1  | 10,58 | 13,54 | 22,61 |       | <b>8225</b> | 5,6   | 0     |
| <b>7880</b> | 0,2   | 0,9   | 0     | 1,9   |       | <b>8234</b> | 3,2   | 0,99  |
| <b>7883</b> | 1,1   | 0     | 0     | 0,05  |       | <b>8283</b> | 2,94  | 33,02 |
| <b>7884</b> | 5,15  | 0,05  | 0,35  | 2,18  |       | <b>6715</b> |       |       |
| <b>7889</b> | 2,92  | 0,19  | 2,12  | 1,18  |       |             |       |       |
| <b>7891</b> | 8,11  | 7,61  | 0,12  | 30,89 |       |             |       |       |
| <b>7892</b> | 3,27  | 4,94  | 0,02  | 0,19  |       |             |       |       |
| <b>7893</b> | 25,39 | 10,34 | 1,82  |       |       |             |       |       |
| <b>7899</b> | 20,21 | 9,96  | 3,72  | 31,48 |       |             |       |       |
| <b>8042</b> | 39,46 | 6,37  | 5,68  | 26,68 | 87,9  |             |       |       |
| <b>8054</b> | 1,45  | 19,22 | 17,17 | 72,28 | 10,18 |             |       |       |
| <b>8056</b> | 17,29 | 13,05 | 27,71 | 33,86 |       |             |       |       |
| <b>8057</b> | 16,46 | 44,36 | 12,87 | 28,13 |       |             |       |       |
| <b>8061</b> | 45,96 | 84,65 |       | 94,71 | 98,71 |             |       |       |
| <b>8065</b> | 46,74 | 80,71 |       | 70,43 | 75,52 |             |       |       |
| <b>8066</b> | 29,49 | 20,93 |       | 21,31 | 89,21 |             |       |       |
| <b>8067</b> | 16,16 | 28,27 |       | 2,05  | 19,86 |             |       |       |
| <b>8068</b> | 8,03  | 4,69  |       | 3,43  | 0,7   |             |       |       |
| <b>8069</b> |       |       |       |       |       |             |       |       |
| <b>7823</b> |       |       |       |       |       |             |       |       |
| <b>7830</b> | 9,8   | 0     |       |       |       |             |       |       |
| <b>7840</b> | 14,04 | 3,2   |       |       |       |             |       |       |
| <b>7841</b> | 7,3   | 0     |       |       |       |             |       |       |
| <b>7850</b> | 6,6   | 0     |       |       |       |             |       |       |
| <b>7853</b> | 9,5   | 0,29  |       |       |       |             |       |       |
| <b>7861</b> | 2,54  | 0,03  |       |       |       |             |       |       |
| <b>7879</b> | 0,21  | 0,36  | 1,69  | 1,69  |       |             |       |       |
| <b>8069</b> | 8,05  | 2,24  |       | 3,41  | 0,05  |             |       |       |



**8070**

64,3

35,52

34,03

86,55

| CD8+ DE<br>PD1+<br>İKON | CD19+ DA<br>SLAM+<br>İKON | CD14+<br>CD46+<br>İKON | DNA<br>NİKON | CD4+DE<br>CD4+<br>SLAM+<br>NİKON | CD8+DE<br>CD8+<br>SLAM+<br>NİKON | CD8+ DE<br>PD1+<br>NİKON | CD19+ DA<br>SLAM+<br>NİKON | CD14+<br>CD46+<br>NİKON |
|-------------------------|---------------------------|------------------------|--------------|----------------------------------|----------------------------------|--------------------------|----------------------------|-------------------------|
| 23,4                    | 56,62                     | 33,61                  | 6759         |                                  |                                  |                          |                            | 48,34                   |
| 7,67                    | 66,19                     | 57,55                  | 6779         |                                  |                                  |                          |                            | 82,83                   |
| 2,44                    | 14,63                     | 92,65                  | 6780         |                                  |                                  |                          |                            | 78,6                    |
| 2,25                    | 27,26                     | 56,76                  | 6781         |                                  |                                  |                          |                            | 75,52                   |
|                         |                           |                        | 6782         |                                  |                                  |                          |                            | 76,74                   |
|                         |                           |                        | 6785         |                                  |                                  |                          |                            | 68,68                   |
| 2,19                    | 34,84                     | 0,91                   | 7864         | 4                                | 1,42                             |                          |                            |                         |
|                         |                           | 72,89                  | 7870         | 7,3                              | 0,9                              | 0,2                      | 1,2                        |                         |
|                         |                           | 62                     | 8060         | 68,24                            | 81.54*                           |                          | 79,22                      | 92,55                   |
|                         |                           | 74,4                   | 8071         | 99,05                            | 91.85*                           |                          | 63,56                      | 84,99                   |
|                         |                           |                        | 7811         |                                  |                                  |                          |                            |                         |
|                         | 0,7                       |                        | 5832         | 0,98                             | 0,3                              | 0,46                     | 0,33                       |                         |
|                         |                           |                        | 5834         | 4,93                             | 0,66                             | 0,1                      | 0,66                       |                         |
|                         |                           | 35,7                   | 6743         |                                  |                                  |                          |                            |                         |
|                         |                           | 41,1                   | 6730         |                                  |                                  |                          |                            | 84,84                   |
|                         |                           |                        | 7834         |                                  | 1,1                              |                          |                            |                         |
|                         |                           |                        | 7851         | 4,4                              | 0                                |                          |                            |                         |
|                         |                           | 87,14                  | 7896         | 0,67                             | 5,19                             | 0,48                     | 2,05                       |                         |
|                         |                           | 84,2                   | 3559         | 30,03                            | 5,14                             | 6,53                     | 22,72                      | 65,25                   |
|                         |                           | 76,5                   | 3560         | 69,04                            | 11,67                            | 7,43                     | 39,07                      | 95,32                   |
|                         |                           | 71,3                   | 3565         |                                  |                                  |                          |                            |                         |
|                         |                           | 75,5                   | 3614         |                                  |                                  |                          |                            |                         |
|                         |                           | 54                     | 4344         |                                  |                                  |                          |                            | 76,7                    |
|                         |                           | 69,3                   | 4379         |                                  |                                  |                          |                            | 68,1                    |
|                         |                           | 79                     | 4382         |                                  |                                  |                          |                            |                         |
|                         |                           | 61,14                  | 6716         |                                  |                                  |                          |                            | 91                      |
|                         |                           | 76,66                  | 6721         |                                  |                                  |                          |                            | 73,2                    |
|                         |                           | 76,48                  | 6722         |                                  |                                  |                          |                            | 67,2                    |
|                         |                           |                        | 7820         |                                  |                                  |                          |                            | 56,5                    |
|                         |                           |                        | 7885         | 5,73                             | 0,07                             | 0,01                     | 0,37                       |                         |
|                         |                           |                        | 6728         |                                  |                                  |                          |                            | 71,5                    |
|                         |                           |                        | 7827         |                                  |                                  |                          |                            |                         |
|                         |                           |                        | 6726         |                                  |                                  |                          |                            | 32,5                    |
|                         |                           |                        | 7807         |                                  |                                  |                          |                            |                         |
|                         |                           |                        | 7815         |                                  |                                  |                          |                            |                         |
|                         |                           | 49                     | 7824         |                                  |                                  |                          |                            |                         |
|                         |                           | 63,5                   | 7825         |                                  |                                  |                          |                            |                         |
|                         |                           |                        | 7845         |                                  |                                  |                          |                            |                         |
|                         |                           | 26,89                  | 7812         |                                  |                                  |                          |                            | 60,8                    |
|                         |                           |                        | 6744         |                                  |                                  |                          |                            | 69,1                    |
|                         |                           |                        | 6733         |                                  |                                  |                          |                            | 84,2                    |
|                         |                           |                        | 7847         | 1,16                             | 1,23                             |                          |                            |                         |
|                         |                           |                        | 7814         |                                  |                                  |                          |                            |                         |
|                         |                           | 60,7                   |              |                                  |                                  |                          |                            |                         |
|                         |                           | 80,41                  |              |                                  |                                  |                          |                            |                         |

11,2  
65,84

30,9  
85,3  
51,4

|       |       |       |
|-------|-------|-------|
| 2,81  | 54,16 |       |
| 7,45  | 28,88 | 89,27 |
| 1,35  | 39,28 | 51,27 |
| 38,22 | 23,32 | 93,84 |
| 3,14  | 15,5  | 0,38  |
| 12,38 |       | 1,22  |
| 6,45  | 13,91 | 94,41 |
| 0,11  | 11,71 | 95,68 |
| 13,22 | 21,07 | 77,74 |
| 2,39  | 28,75 | 86,51 |

|      |      |
|------|------|
| 0,33 | 0,62 |
| 0,8  | 1,03 |

37,71

93,9

| <b>SSPE<br/>DNA #</b> | <b>SSPE (-)<br/>ELISPOT<br/>SPON</b> | <b>SSPE MV-<br/>H<br/>ELISPOT</b> | <b>SSPE MV-<br/>C<br/>ELISPOT</b> | <b>SSPE MV-<br/>N2<br/>ELISPOT</b> | <b>SSPE MV-<br/>M<br/>ELISPOT</b> | <b>SSPE MV-<br/>N1<br/>ELISPOT</b> | <b>SSPE MV-<br/>POOL<br/>ELISPOT</b> | <b>IKON<br/>DNA #</b> |
|-----------------------|--------------------------------------|-----------------------------------|-----------------------------------|------------------------------------|-----------------------------------|------------------------------------|--------------------------------------|-----------------------|
| 2315                  |                                      |                                   |                                   |                                    |                                   |                                    |                                      | 3573                  |
| 2325                  | 1                                    | 2                                 | 20                                | 0                                  | 0                                 | 0                                  | 14                                   | 3574                  |
| 2379                  |                                      |                                   |                                   |                                    |                                   |                                    |                                      | 3575                  |
| 6707                  |                                      |                                   |                                   |                                    |                                   |                                    |                                      | 3576                  |
| 6712                  |                                      |                                   |                                   |                                    |                                   |                                    |                                      | 3577                  |
| 6719                  |                                      |                                   |                                   |                                    |                                   |                                    |                                      | 3578                  |
| 6729                  |                                      |                                   |                                   |                                    |                                   |                                    |                                      | 3579                  |
| 6734                  |                                      |                                   |                                   |                                    |                                   |                                    |                                      | 3580                  |
| 6735                  |                                      |                                   |                                   |                                    |                                   |                                    |                                      | 3581                  |
| 6750                  |                                      |                                   |                                   |                                    |                                   |                                    |                                      | 3582                  |
| 6751                  |                                      |                                   |                                   |                                    |                                   |                                    |                                      | 3612                  |
| 6752                  |                                      |                                   |                                   |                                    |                                   |                                    |                                      | 3613                  |
| 6753                  |                                      |                                   |                                   |                                    |                                   |                                    |                                      | 3678                  |
| 6754                  |                                      |                                   |                                   |                                    |                                   |                                    |                                      | 3679                  |
| 6760                  |                                      |                                   |                                   |                                    |                                   |                                    |                                      | 3683                  |
| 6762                  |                                      |                                   |                                   |                                    |                                   |                                    |                                      | 3684                  |
| 6763                  |                                      |                                   |                                   |                                    |                                   |                                    |                                      | 3685                  |
| 6764                  |                                      |                                   |                                   |                                    |                                   |                                    |                                      | 5831                  |
| 6765                  |                                      |                                   |                                   |                                    |                                   |                                    |                                      | 5833                  |
| 6766                  |                                      |                                   |                                   |                                    |                                   |                                    |                                      | 6714                  |
| 6767                  |                                      |                                   |                                   |                                    |                                   |                                    |                                      | 6715                  |
| 6768                  |                                      |                                   |                                   |                                    |                                   |                                    |                                      | 6717                  |
| 6769                  |                                      |                                   |                                   |                                    |                                   |                                    |                                      | 6720                  |
| 6776                  |                                      |                                   |                                   |                                    |                                   |                                    |                                      | 6723                  |
| 6777                  |                                      |                                   |                                   |                                    |                                   |                                    |                                      | 6724                  |
| 6786                  |                                      |                                   |                                   |                                    |                                   |                                    |                                      | 6725                  |
| 6787                  | 38                                   | 42                                | 38                                | 58                                 | 62                                | 36                                 | 46                                   | 6727                  |
| 6788                  |                                      |                                   |                                   |                                    |                                   |                                    |                                      | 6731                  |
| 6789                  |                                      |                                   |                                   |                                    |                                   |                                    |                                      | 6732                  |
| 6792                  | 4                                    | 7                                 | 9                                 | 35                                 | 7                                 | 12                                 | 16                                   | 6736                  |
| 6793                  | 11                                   | 14                                | 9                                 | 24                                 | 2                                 | 4                                  | 22                                   | 6737                  |
| 6794                  | 5                                    | 6                                 | 6                                 | 22                                 | 7                                 | 4                                  | 9                                    | 6738                  |
| 6796                  |                                      |                                   |                                   |                                    |                                   |                                    |                                      | 6739                  |
| 6797                  | 0                                    | 0                                 | 3                                 | 5                                  | 1                                 | 1                                  | 30                                   | 6740                  |
| 6798                  |                                      |                                   |                                   |                                    |                                   |                                    |                                      | 6741                  |
| 7801                  | 3                                    | 14                                | 64                                | 36                                 | 2                                 | 8                                  |                                      | 6742                  |
| 7803                  | 6                                    | 8                                 | 84                                | 50                                 | 4                                 | 6                                  | 216                                  | 6761                  |
| 7805                  | 24                                   | 40                                | 164                               | 40                                 | 35                                | 14                                 | 75                                   | 6770                  |
| 7806                  | 1                                    | 2                                 | 114                               | 166                                | 3                                 | 13                                 | 222                                  | 6771                  |
| 7809                  |                                      |                                   |                                   |                                    |                                   |                                    |                                      | 6772                  |
| 7810                  | 12                                   | 12                                | 568                               | 564                                | 5                                 | 62                                 | 599                                  | 6778                  |
| 7813                  | 36                                   | 25                                | 599                               | 707                                | 28                                | 35                                 | 703                                  | 6783                  |
| 7818                  | 2                                    | 3                                 | 399                               | 381                                | 4                                 | 17                                 | 390                                  | 6784                  |
| 7822                  |                                      |                                   |                                   |                                    |                                   |                                    |                                      | 6790                  |
| 7823                  |                                      |                                   |                                   |                                    |                                   |                                    |                                      | 6791                  |
| 7826                  | 24                                   | 40                                | 32                                | 35                                 | 38                                | 41                                 | 46                                   | 6800                  |



8070

8070

| <b>IKON (-)<br/>ELISPOT<br/>SPON</b> | <b>IKON MV-<br/>H<br/>ELISPOT</b> | <b>IKON MV-<br/>C<br/>ELISPOT</b> | <b>IKON MV-<br/>N2<br/>ELISPOT</b> | <b>IKON MV-<br/>M<br/>ELISPOT</b> | <b>IKON MV-<br/>N1<br/>ELISPOT</b> | <b>IKON MV-<br/>POOL<br/>ELISPOT</b> | <b>NIKON<br/>DNA #</b> | <b>NIKON (-)<br/>ELISPOT<br/>SPON</b> |
|--------------------------------------|-----------------------------------|-----------------------------------|------------------------------------|-----------------------------------|------------------------------------|--------------------------------------|------------------------|---------------------------------------|
| 0                                    | 0                                 | 0                                 | 0                                  | 0                                 | 0                                  | 0                                    | 3559                   | 5                                     |
| 0                                    | 0                                 | 0                                 | 0                                  | 0                                 | 0                                  | 0                                    | 3560                   | 2                                     |
| 1                                    | 1                                 | 1                                 | 0                                  | 0                                 | 1                                  | 2                                    | 3565                   | 5                                     |
| 1                                    | 0                                 | 1                                 | 1                                  | 0                                 | 1                                  | 251                                  | 3614                   | 4                                     |
| 0                                    | 1                                 | 0                                 | 0                                  | 0                                 | 1                                  | 0                                    | 4344                   |                                       |
| 0                                    | 0                                 | 1                                 | 0                                  | 1                                 | 1                                  | 2                                    | 4379                   | 5                                     |
|                                      |                                   |                                   |                                    |                                   |                                    |                                      | 4382                   | 1                                     |
|                                      |                                   |                                   |                                    |                                   |                                    |                                      | 5832                   |                                       |
|                                      |                                   |                                   |                                    |                                   |                                    |                                      | 5834                   |                                       |
|                                      |                                   |                                   |                                    |                                   |                                    |                                      | 6716                   |                                       |
| 1                                    | 1                                 | 0                                 | 0                                  | 0                                 | 0                                  | 0                                    | 6721                   |                                       |
| 3                                    | 1                                 | 0                                 | 1                                  | 0                                 | 0                                  | 0                                    | 6722                   |                                       |
|                                      |                                   |                                   |                                    |                                   |                                    |                                      | 6726                   |                                       |
|                                      |                                   |                                   |                                    |                                   |                                    |                                      | 6728                   |                                       |
| 1                                    | 1                                 | 1                                 | 1                                  | 2                                 | 1                                  | 4                                    | 6730                   |                                       |
|                                      |                                   |                                   |                                    |                                   |                                    |                                      | 6733                   |                                       |
|                                      |                                   |                                   |                                    |                                   |                                    |                                      | 6743                   |                                       |
|                                      |                                   |                                   |                                    |                                   |                                    |                                      | 6744                   |                                       |
|                                      |                                   |                                   |                                    |                                   |                                    |                                      | 6759                   |                                       |
|                                      |                                   |                                   |                                    |                                   |                                    |                                      | 6779                   |                                       |
|                                      |                                   |                                   |                                    |                                   |                                    |                                      | 6780                   |                                       |
|                                      |                                   |                                   |                                    |                                   |                                    |                                      | 6781                   |                                       |
|                                      |                                   |                                   |                                    |                                   |                                    |                                      | 6782                   | 38                                    |
|                                      |                                   |                                   |                                    |                                   |                                    |                                      | 6785                   |                                       |
|                                      |                                   |                                   |                                    |                                   |                                    |                                      | 6799                   | 6                                     |
|                                      |                                   |                                   |                                    |                                   |                                    |                                      | 7807                   |                                       |
|                                      |                                   |                                   |                                    |                                   |                                    |                                      | 7811                   | 28                                    |
|                                      |                                   |                                   |                                    |                                   |                                    |                                      | 7812                   |                                       |
|                                      |                                   |                                   |                                    |                                   |                                    |                                      | 7814                   | 13                                    |
|                                      |                                   |                                   |                                    |                                   |                                    |                                      | 7815                   | 10                                    |
|                                      |                                   |                                   |                                    |                                   |                                    |                                      | 7820                   | 6                                     |
|                                      |                                   |                                   |                                    |                                   |                                    |                                      | 7824                   |                                       |
|                                      |                                   |                                   |                                    |                                   |                                    |                                      | 7825                   |                                       |
|                                      |                                   |                                   |                                    |                                   |                                    |                                      | 7827                   |                                       |
|                                      |                                   |                                   |                                    |                                   |                                    |                                      | 7834                   | 10                                    |
|                                      |                                   |                                   |                                    |                                   |                                    |                                      | 7845                   |                                       |
|                                      |                                   |                                   |                                    |                                   |                                    |                                      | 7847                   |                                       |
|                                      |                                   |                                   |                                    |                                   |                                    |                                      | 7851                   |                                       |
|                                      |                                   |                                   |                                    |                                   |                                    |                                      | 7864                   |                                       |
|                                      |                                   |                                   |                                    |                                   |                                    |                                      | 7870                   | 1                                     |
|                                      |                                   |                                   |                                    |                                   |                                    |                                      | 7885                   | 20                                    |
|                                      |                                   |                                   |                                    |                                   |                                    |                                      | 7896                   |                                       |
|                                      |                                   |                                   |                                    |                                   |                                    |                                      | 8060                   |                                       |
|                                      |                                   |                                   |                                    |                                   |                                    |                                      | 8071                   |                                       |
| 33                                   | 162                               | 840                               | 536                                | 17                                | 13                                 | 1111                                 |                        |                                       |

|   |   |     |    |    |   |    |
|---|---|-----|----|----|---|----|
| 7 | 2 | 15  |    | 36 |   | 26 |
| 1 | 4 | 357 | 24 | 1  | 0 | 79 |

|   |    |   |   |   |   |     |
|---|----|---|---|---|---|-----|
| 1 | 14 | 1 | 1 | 0 | 1 | 105 |
|---|----|---|---|---|---|-----|





| NIKON<br>MV-H<br>ELISPOT | NIKON<br>MV-C<br>ELISPOT | NIKON<br>MV-N2<br>ELISPOT | NIKON<br>MV-M<br>ELISPOT | NIKON<br>MV-N1<br>ELISPOT | NIKON<br>MV-POOL<br>ELISPOT |
|--------------------------|--------------------------|---------------------------|--------------------------|---------------------------|-----------------------------|
|--------------------------|--------------------------|---------------------------|--------------------------|---------------------------|-----------------------------|

|    |    |    |    |   |    |
|----|----|----|----|---|----|
| 3  | 2  | 1  | 3  | 3 | 20 |
| 3  | 2  | 3  | 2  | 7 | 9  |
| 5  | 6  | 4  | 6  | 8 | 10 |
| 1  | 1  | 0  | 0  | 0 | 0  |
| 15 | 21 | 10 | 14 | 5 | 23 |
| 2  | 34 |    | 7  | 1 | 3  |

|    |     |     |    |    |     |
|----|-----|-----|----|----|-----|
| 42 | 38  | 58  | 62 | 36 | 46  |
| 5  | 42  | 11  | 3  | 3  | 14  |
| 27 | 342 | 376 | 22 | 3  | 402 |
| 7  | 54  | 342 | 10 | 6  | 315 |
| 20 | 142 | 279 | 76 | 35 | 833 |
| 9  | 6   | 285 | 4  | 6  | 140 |

|   |   |   |   |    |   |
|---|---|---|---|----|---|
| 1 | 2 | 2 | 2 | 11 | 6 |
|---|---|---|---|----|---|

|    |    |    |    |    |     |
|----|----|----|----|----|-----|
| 1  | 1  | 0  | 1  | 1  | 250 |
| 16 | 14 | 15 | 12 | 17 | 62  |
